# Supplementary material
Source: PubMed Central journal article supplement (PMC3780883)
Supplement: 1313857110_pnas.201313857SI.pdf [file 1313857110_pnas.201313857SI.pdf]

# Supporting Information

Maron et al. 10.1073/pnas.1313857110

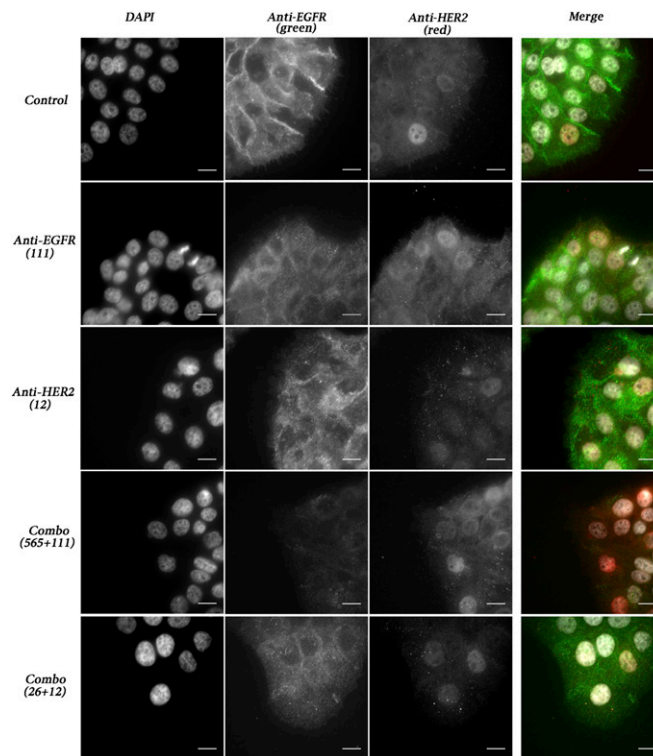

**Fig. S1.** Homocombinations of antibodies to epidermal growth factor receptor (EGFR) or to HER2 promote receptor down-regulation. BXP3 cells growing on fibronectin-coated coverslips were treated for 48 h with the indicated mAbs to EGFR (111 and 565) or to HER2 (12 and 26), either singly or in combination. Thereafter, cells were washed, permeabilized, and fixed. Shown are the results of staining with antibodies to EGFR (green) and HER2 (red), as well as counterstaining with DAPI.
